# Supplementary material
Source: Copernicus journal article supplement (doi:10.5194/bg-23-3995-2026)
Supplement: Supplementary file 1 [file bg-23-3995-2026-supplement.pdf]

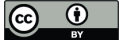

*Supplement of*

## **Divergent carbon use efficiency-growth rate tradeoff in popular biological growth models**

**Jinyun Tang et al.**

*Correspondence to:* Jinyun Tang ([jinyuntang@lbl.gov](mailto:jinyuntang@lbl.gov))

The copyright of individual parts of the supplement might differ from the article licence.

## Content of this file

Section S1 to S6.

Figures S1 to S5.

Table S1.

## Introduction

Below we provide mathematical formulations of the different models used in the manuscript. All models are coded in Matlab, and can be found at [https://github.com/jinyunltang/cue\\_paper](https://github.com/jinyunltang/cue_paper).

### S1. The modified Droop model (Thingstad, 1987)

The mDroop model is based on Thingstad (1987), who developed a model of bacteria that feeds on substrates containing carbon, nitrogen, and phosphorus. For simplicity, we removed the nitrogen and phosphorus components here, and adopted symbols that are more consistent with the remaining of this manuscript.

Specifically, the dynamics for structural biomass  $B_V$  is formulated as

|                              |      |
|------------------------------|------|
| $\frac{dB_V}{dt} = \mu B_V,$ | (S1) |
|------------------------------|------|

and that for total biomass  $B_X$  is formulated as

|                                                                                   |      |
|-----------------------------------------------------------------------------------|------|
| $\frac{dB_T}{dt} = \left( j_A \frac{Q_{max}-Q}{Q_{max}-Q_{min}} - R \right) B_V.$ | (S2) |
|-----------------------------------------------------------------------------------|------|

where the specific substrate uptake is down-regulated from  $j_A$  by the carbon quota limiter

$$\left( \frac{Q_{max}-Q}{Q_{max}-Q_{min}} \right).$$

Based on equations (S1) and (S2), the dynamics of carbon quota  $Q$  is

|                                                                                                                                                                                       |      |
|---------------------------------------------------------------------------------------------------------------------------------------------------------------------------------------|------|
| $\frac{dQ}{dt} = \frac{d}{dt} \left( \frac{B_T}{B_V} \right) = \frac{1}{B_V} \frac{dB_T}{dt} - \frac{B_T}{B_V^2} \frac{dB_V}{dt} = j_A \frac{Q_{max}-Q}{Q_{max}-Q_{min}} - R - Q\mu,$ | (S3) |
|---------------------------------------------------------------------------------------------------------------------------------------------------------------------------------------|------|

Note that carbon quota  $Q$  has its maximum and minimum defined as  $Q_{max}$  and  $Q_{min}$ ,

respectively. Because structural biomass  $B_V$  is part of  $B_X$ , we have  $Q_{min} \geq 1$ .

Accordingly, the specific growth rate  $\mu$  is computed as a function of carbon quota via

|                                                         |      |
|---------------------------------------------------------|------|
| $\mu = \mu_{max} \left( 1 - \frac{Q_{min}}{Q} \right),$ | (S4) |
|---------------------------------------------------------|------|

and the specific respiration  $R$  is computed as

|                                      |      |
|--------------------------------------|------|
| $R = c_1 Q \mu + c_2 (Q - Q_{min}).$ | (S5) |
|--------------------------------------|------|

where coefficient  $c_1$  relates respiration  $R$  to growth, and coefficient  $c_2$  relates respiration  $R$  to maintenance.

*Exponential growth*

For exponential growth, since  $\frac{dQ}{dt} = 0$ , one has

$$j_A \frac{Q_{max}-Q}{Q_{max}-Q_{min}} - R - Q\mu = 0, \quad (S6)$$

which when combined with equation (S5) leads to

$$\frac{j_A Q_{max}}{Q_{max}-Q_{min}} = \left[ (1+c_1)\mu + c_2 + \frac{j_A}{Q_{max}-Q_{min}} \right] Q - c_2 Q_{min}. \quad (S7)$$

By defining  $\Delta Q = Q_{max} - Q_{min}$ ,  $Q$  can be solved from equation (S7) as

$$Q = \frac{j_A Q_{max} + c_2 Q_{min} \Delta Q}{[(1+c_1)\mu + c_2] \Delta Q + j_A}. \quad (S8)$$

When equation (S8) is combined with (S4), the specific growth rate is computed as a function of substrate uptake  $j_A$  through

$$\frac{\mu}{\mu_{max}} = \frac{j_A \Delta Q}{j_A Q_{max} + [c_2 + (1+c_1)\mu_{max}] Q_{min} \Delta Q}. \quad (S9)$$

Meanwhile, by rewriting equation (S4) as

$$Q = Q_{min} \frac{\mu_{max}}{\mu_{max}-\mu}, \quad (S10)$$

then using equations (S3) and (S5), we can compute the actual substrate uptake  $q$  as

$$\begin{aligned} q &= j_A \frac{Q_{max}-Q}{Q_{max}-Q_{min}} = R + Q\mu = [(1+c_1)\mu + c_2]Q - c_2 Q_{min}, \\ &= \left( [(1+c_1)\mu + c_2] \frac{\mu_{max}}{\mu_{max}-\mu} - c_2 \right) \frac{Q_{min}}{Y_S}, \\ &= \frac{(1+c_1)\mu_{max} + c_2}{\mu_{max}-\mu} \frac{Q_{min}}{Y_S} \mu. \end{aligned} \quad (S11)$$

where  $Y_S$  is the reserve biomass yield from assimilating the substrate, which leads to the equation of  $q(S)$  in Table 1 of the main text.

For the structural biomass yield  $Y_V$ , it can be computed as

$$Y_V = \frac{\mu}{q} = \frac{\mu_{max}-\mu}{(1+c_1)\mu_{max} + c_2} \frac{Y_S}{Q_{min}}. \quad (S12)$$

Following this, the total biomass yield is

$$Y_B = Y_V Q = Y_V Q_{min} \frac{\mu_{max}}{\mu_{max}-\mu} = \frac{\mu_{max}}{(1+c_1)\mu_{max} + c_2} Y_S, \quad (S13)$$

which is the equation shown in Table 1 of the manuscript.

## S2. The variable-internal-stores model

This model is based on the microbial model in Williams (1967) and plant model in Thornley (1972). Since this model assumes that the metabolic demands for maintenance  $m_V B_V$  and growth  $B_V \frac{v_E x}{K+x}$  are parallelly met by reserve biomass turnover, it computes the reserve biomass as

$$\frac{dB_X}{dt} = j_A B_V - m_V B_V - B_V \frac{v_E x}{K+x}, \quad (S14)$$

where  $x$  is the reserve density defined as  $x = B_X/B_V$ .

Accordingly, the structural biomass growth is computed as,

$$\frac{dB_V}{dt} = Y_{RV} B_V v_E \frac{x}{K+x}. \quad (S15)$$

To ease the model intercomparison, we simplify the nonlinear kinetics with linear kinetics, such that

$$\frac{dB_X}{dt} = j_A B_V - m_V B_V - B_V v_E x, \quad (S16)$$

and

$$\mu = \frac{1}{B_V} \frac{dB_V}{dt} = Y_{RV} v_E x. \quad (S17)$$

Accordingly, the reserve density dynamics  $x$  becomes

$$\frac{dx}{dt} = \frac{1}{B_V} \frac{d}{dt} (B_X) + B_X \frac{d}{dt} \left( \frac{1}{B_V} \right) = j_A - m_V - (\mu + v_E)x. \quad (S18)$$

*Exponential growth*

Under exponential growth, the reserve density is at steady state  $\frac{dx}{dt} = 0$ , which leads to

$$j_A = m_V + (\mu + v_E)x, \quad (S19)$$

and

$$x = \frac{\mu}{Y_{RV} v_E}. \quad (S20)$$

The combination of equations (S19) and (S20) leads to

$$j_A = \frac{\mu(\mu + v_E)}{Y_{RV} v_E} + m_V = \frac{\mu(1 + \mu/v_E)}{Y_{RV}} + m_V, \quad (S21)$$

which can be rewritten as

$$\mu^2 + v_E \mu - (j_V - m_V) v_E Y_{RV} = 0, \quad (S22)$$

from which  $\mu$  can be solved as a function of substrate uptake as

$$\mu = \frac{v_E}{2} \left( -1 + \sqrt{1 + \frac{4(j_A - m_V) Y_{RV}}{v_E}} \right). \quad (S23)$$

Additionally, one can compute the structural biomass yield as

|                                                                                     |       |
|-------------------------------------------------------------------------------------|-------|
| $Y_V = \frac{\mu}{j_A} Y_S = \frac{\mu Y_S Y_{RV}}{(1 + \mu/v_E)\mu + m_V Y_{RV}},$ | (S24) |
|-------------------------------------------------------------------------------------|-------|

and the total biomass yield as

|                                                                                                             |       |
|-------------------------------------------------------------------------------------------------------------|-------|
| $Y_B = Y_V(1 + x) = \frac{\mu Y_S}{(1 + \mu/v_E)\mu + m_V Y_{RV}} \left( Y_{RV} + \frac{\mu}{v_E} \right).$ | (S25) |
|-------------------------------------------------------------------------------------------------------------|-------|

### S3. Standard DEB model

Following Kooijman (2009) and Tang and Riley (2023), the standard DEB (sDEB) model assumes that reserve biomass is mobilized via the first order kinetics when the reserve biomass density ( $x = B_X/B_V$ ) is used as control variable. Specifically, the reserve density dynamics is formulated as

|                                |       |
|--------------------------------|-------|
| $\frac{dx}{dt} = j_A - v_E x.$ | (S26) |
|--------------------------------|-------|

Accordingly, the structural biomass growth  $\mu$  is driven by the mobilized reserve biomass flux  $(v_E - \mu)x$  after subtracting the demand from maintenance  $m_V/Y_{RV}$ , such that

|                                                           |       |
|-----------------------------------------------------------|-------|
| $(v_E - \mu)x - \frac{m_V}{Y_{RV}} = \frac{\mu}{Y_{RV}},$ | (S27) |
|-----------------------------------------------------------|-------|

which leads to

|                                                                                  |       |
|----------------------------------------------------------------------------------|-------|
| $\frac{1}{B_V} \frac{dB_V}{dt} = \mu = \frac{Y_{RV} v_E x - m_V}{1 + Y_{RV} x},$ | (S28) |
|----------------------------------------------------------------------------------|-------|

*Exponential growth*

For exponential growth, since  $\frac{dx}{dt} = 0$ , one has

|                |       |
|----------------|-------|
| $j_A = v_E x,$ | (S29) |
|----------------|-------|

which leads to

|                                                        |       |
|--------------------------------------------------------|-------|
| $\mu = \frac{Y_{RV} j_A - m_V}{1 + Y_{RV} j_A / v_E}.$ | (S30) |
|--------------------------------------------------------|-------|

From equations (S29) and (S30), the structural biomass yield is computed as

|                                                                                                    |       |
|----------------------------------------------------------------------------------------------------|-------|
| $Y_V = \frac{\mu}{j_A} Y_S = \frac{\mu}{m_V + \mu} \left( 1 - \frac{\mu}{v_E} \right) Y_S Y_{RV},$ | (S31) |
|----------------------------------------------------------------------------------------------------|-------|

And the total biomass yield is computed as

|                                                                                                                                        |       |
|----------------------------------------------------------------------------------------------------------------------------------------|-------|
| $Y_B = Y_V(1 + x) = \frac{\mu}{m_V + \mu} \left( 1 - \frac{\mu}{v_E} \right) \left( Y_{RV} + \frac{m_V + \mu}{v_E - \mu} \right) Y_S,$ | (S32) |
|----------------------------------------------------------------------------------------------------------------------------------------|-------|

### S4. Modified DEB model

The mDEB model differs from the sDEB model by allowing the reserve biomass to be mobilized via nonlinear kinetics without involving the growth-induced dilution effect (Tang and

Riley, 2025), instead, the growth-induced dilution acts to lower the reserve density. When taking the linear approximation (for easier model comparison), the reserve density dynamics is

$$\frac{dx}{dt} = j_A - v_E x - \mu x, \quad (\text{S33})$$

where the term  $-\mu x$  signifies the dilution effect that is absent from that for the sDEB model (see eq. (S26)).

The corresponding equation of structural biomass is

$$\frac{1}{B_V} \frac{dB_V}{dt} = \mu = Y_{RV} v_E x - m_V, \quad (\text{S34})$$

*Exponential growth*

For exponential growth, since  $\frac{dx}{dt} = 0$ , one has

$$j_A = (v_E + \mu)x, \quad (\text{S35})$$

which when entered in equation (S34), one has

$$\mu = Y_{RV} v_E \frac{j_A}{v_E + \mu} - m_V. \quad (\text{S36})$$

Equation (S36) can be rewritten as

$$\mu^2 + (m_V + v_E)\mu - (j_A Y_{RV} - m_V)v_E = 0, \quad (\text{S37})$$

and has the solution

$$\mu = \frac{m_V + v_E}{2} \left( -1 + \sqrt{1 + \frac{4v_E(j_A Y_{RV} - m_V)}{(m_V + v_E)^2}} \right). \quad (\text{S38})$$

By combining equations (S35) and (S36), one may obtain

$$j_A = \left( 1 + \frac{\mu}{v_E} \right) \left( \frac{\mu + m_V}{Y_{RV}} \right), \quad (\text{S39})$$

which can be used to compute the specific substrate uptake

$$q = \left( \frac{v_E + \mu}{v_E} \right) \left( \frac{\mu + m_V}{Y_{RV} Y_S} \right) = \left( \frac{v_E + \mu}{v_E} \right) \left( \frac{\mu + m_V}{\mu} \right) \frac{\mu}{Y_{RV} Y_S}. \quad (\text{S40})$$

Thence, the structural biomass yield is

$$Y_V = \frac{\mu}{q} = \frac{v_E \mu}{(\mu + v_E)(\mu + m_V)} Y_{RV} Y_S. \quad (\text{S41})$$

And the total biomass yield is

$$Y_B = (1 + x)Y_V = \left( 1 + \frac{\mu + m_V}{Y_{RV} v_E} \right) \frac{v_E \mu Y_{RV} Y_S}{(\mu + v_E)(\mu + m_V)} = \frac{(Y_{RV} v_E + \mu + m_V) \mu}{(\mu + m_V)(\mu + v_E)} Y_S. \quad (\text{S42})$$

## S5. Soil carbon model

The six soil carbon models used for the analysis of dynamic CUE under month-to-month varying carbon inputs are described below. All models consider one homogeneous microbial group feeding on one fast pool C and one slow pool C. The model grid is assumed to be 1 m<sup>2</sup> in horizontal area and 1 m in depth. We formulated the substrate uptake based on the argument in Tang et al. (2024), and added all microbial biomass from mortality to the slow pool C. In all model simulations, initial values of microbial biomass, fast and slow carbon pools are derived based on their respective steady-state-solutions under an annual carbon input of 350 gC m<sup>-2</sup> year<sup>-1</sup>. All the models are coded in Matlab, which are available at [https://github.com/jinyun1tang/cue\\_paper](https://github.com/jinyun1tang/cue_paper).

|                                                                                                                                                                                                                                                                                |       |
|--------------------------------------------------------------------------------------------------------------------------------------------------------------------------------------------------------------------------------------------------------------------------------|-------|
| <b>Pirt model</b>                                                                                                                                                                                                                                                              |       |
| Fast pool C dynamics<br>$\frac{dC_l}{dt} = (1 - a)F_{npp} - C_B \left( \frac{V_l C_l/K_l}{1 + C_l/K_l + C_S/K_S} + \frac{m_V}{Y_b} \frac{V_l C_l/K_l}{V_l C_l/K_l + V_S C_S/K_S} \right)$ $= (1 - a)F_{npp} - C_B h_l \left( 1 + \frac{m_V}{h Y_b} \right),$                   | (S43) |
| Slow pool C dynamics<br>$\frac{dC_S}{dt} = aF_{npp} + \gamma_B C_B - C_B \left( \frac{V_S C_S/K_S}{1 + C_l/K_l + C_S/K_S} + \frac{m_V}{Y_b} \frac{V_S C_S/K_S}{V_l C_l/K_l + V_S C_S/K_S} \right)$ $= aF_{npp} + \gamma_B C_B - C_B h_S \left( 1 + \frac{m_V}{h Y_b} \right),$ | (S44) |
| $h = h_l + h_S,$                                                                                                                                                                                                                                                               | (S45) |
| Specific microbial growth rate<br>$\mu = Y_b h,$                                                                                                                                                                                                                               | (S46) |
| Microbial Biomass dynamics<br>$\frac{dC_B}{dt} = (\mu - \gamma_B) C_B.$                                                                                                                                                                                                        | (S47) |
| <b>Compromise model</b>                                                                                                                                                                                                                                                        |       |
| Fast pool C dynamics<br>$\frac{dC_l}{dt} = (1 - a)F_{npp} - C_B \left( \frac{(V_l + m_V/Y_b)C_l/K_l}{1 + C_l/K_l + C_S/K_S} \right) = (1 - a)F_{npp} - C_B h_l,$                                                                                                               | (S48) |
| Slow pool C dynamics<br>$\frac{dC_S}{dt} = aF_{npp} + \gamma_B C_B - C_B \frac{(V_S + m_V/Y_b)C_S/K_S}{1 + C_l/K_l + C_S/K_S} = aF_{npp} + \gamma_B C_B - C_B h_S,$                                                                                                            | (S49) |

|                                                                                                                                                                                |       |
|--------------------------------------------------------------------------------------------------------------------------------------------------------------------------------|-------|
| $h = h_l + h_s,$                                                                                                                                                               | (S50) |
| Specific microbial growth rate<br>$\mu = Y_b h - m_v$                                                                                                                          | (S51) |
| Microbial Biomass dynamics<br>$\frac{dC_B}{dt} = (\mu - \gamma_B)C_B.$                                                                                                         | (S52) |
| <b>Modified Droop model</b>                                                                                                                                                    |       |
| Fast pool C dynamics<br>$\frac{dC_l}{dt} = (1 - a)F_{npp} - B_V \frac{\theta V_l C_l / K_l}{1 + C_l / K_l + C_S / K_S} = (1 - a)F_{npp} - B_V \theta h_l,$                     | (S53) |
| Slow pool C dynamics<br>$\frac{dC_S}{dt} = aF_{npp} + \gamma_B B_T - B_V \frac{\theta V_S C_S / K_S}{1 + C_l / K_l + C_S / K_S} = aF_{npp} + \gamma_B B_V - B_V \theta h_S,$   | (S54) |
| $\theta = \frac{Q_{max} - Q}{Q_{max} - Q_{min}}, Q = \frac{B_T}{B_V}$                                                                                                          | (S55) |
| $h = h_l + h_s,$                                                                                                                                                               | (S56) |
| Specific microbial growth rate<br>$\mu = \mu_{max} \left(1 - \frac{Q_{min}}{Q}\right),$                                                                                        | (S57) |
| Specific microbial respiration rate<br>$R = c_1 Q \mu + c_2 (Q - Q_{min}),$                                                                                                    | (S58) |
| Total microbial biomass dynamics<br>$\frac{dB_T}{dt} = B_V (h \theta Y_b - R) - \gamma_B B_T,$                                                                                 | (S59) |
| Structural microbial biomass dynamics<br>$\frac{dB_V}{dt} = (\mu - \gamma_B) B_V.$                                                                                             | (S60) |
| <b>Variable-internal-store model</b>                                                                                                                                           |       |
| Fast pool C dynamics<br>$\frac{dC_l}{dt} = (1 - a)F_{npp} - B_V \frac{V_l C_l / K_l}{1 + C_l / K_l + C_S / K_S} = (1 - a)F_{npp} - B_V h_l,$                                   | (S61) |
| Slow pool C dynamics<br>$\frac{dC_S}{dt} = aF_{npp} + \gamma_B (B_C + B_V) - B_V \frac{V_S C_S / K_S}{1 + C_l / K_l + C_S / K_S} = aF_{npp} + \gamma_B (B_C + B_V) - B_V h_S,$ | (S62) |
| $h = h_l + h_s,$                                                                                                                                                               | (S63) |

|                                                                                                                                                          |       |
|----------------------------------------------------------------------------------------------------------------------------------------------------------|-------|
| Reserve microbial biomass dynamics                                                                                                                       | (S64) |
| $\frac{dB_C}{dt} = (Y_S h - m_V) B_V - B_C v_E - \gamma_B B_C,$                                                                                          |       |
| Structural microbial biomass dynamics                                                                                                                    | (S65) |
| $\frac{dB_V}{dt} = (\mu - \gamma_B) B_V,$                                                                                                                |       |
| Specific microbial growth rate                                                                                                                           | (S66) |
| $\mu = Y_{RV} v_E B_C / B_V.$                                                                                                                            |       |
| <b>sDEB model</b>                                                                                                                                        |       |
| Fast pool C dynamics                                                                                                                                     | (S67) |
| $\frac{dC_l}{dt} = (1 - a) F_{npp} - B_V \frac{v_l C_l / K_l}{1 + C_l / K_l + C_S / K_S} = (1 - a) F_{npp} - B_V h_l,$                                   |       |
| Slow pool C dynamics                                                                                                                                     | (S68) |
| $\frac{dC_S}{dt} = a F_{npp} + \gamma_B (B_C + B_V) - B_V \frac{v_S C_S / K_S}{1 + C_l / K_l + C_S / K_S} = a F_{npp} + \gamma_B (B_C + B_V) - B_V h_S,$ |       |
| $h = h_l + h_S, x = B_C / B_V$                                                                                                                           | (S69) |
| Specific microbial growth rate                                                                                                                           | (S70) |
| $\mu = \frac{Y_{RV} v_E x - m_V}{1 + Y_{RV} x},$                                                                                                         |       |
| Reserve microbial biomass dynamics                                                                                                                       | (S71) |
| $\frac{dB_C}{dt} = Y_S B_V h - (v_E - \mu) B_C - \gamma_B B_C,$                                                                                          |       |
| Structural microbial biomass dynamics                                                                                                                    | (S72) |
| $\frac{dB_V}{dt} = (\mu - \gamma_B) B_V.$                                                                                                                |       |
| <b>mDEB model</b>                                                                                                                                        |       |
| Fast pool C dynamics                                                                                                                                     | (S73) |
| $\frac{dC_l}{dt} = (1 - a) F_{npp} - B_V \frac{v_l C_l / K_l}{1 + C_l / K_l + C_S / K_S} = (1 - a) F_{npp} - B_V h_l,$                                   |       |
| Slow pool C dynamics                                                                                                                                     | (S74) |
| $\frac{dC_S}{dt} = a F_{npp} + \gamma_B (B_C + B_V) - B_V \frac{v_S C_S / K_S}{1 + C_l / K_l + C_S / K_S} = a F_{npp} + \gamma_B (B_C + B_V) - B_V h_S,$ |       |
| $h = h_l + h_S,$                                                                                                                                         | (S75) |
| Specific microbial growth rate                                                                                                                           | (S76) |
| $\mu = Y_{RV} v_E B_C / B_V - m_V,$                                                                                                                      |       |

|                                                         |       |
|---------------------------------------------------------|-------|
| Reserve microbial biomass dynamics                      | (S77) |
| $\frac{dB_C}{dt} = Y_S B_V h - v_E B_C - \gamma_B B_C,$ |       |
| Structural microbial biomass dynamics                   | (S78) |
| $\frac{dB_V}{dt} = (\mu - \gamma_B) B_V.$               |       |

## S6. Temperature dependence

Following Tang and Riley (2015) and Tang et al. (2021), we parameterize the temperature sensitivity with three different functions.  $V_l$ ,  $V_S$  and  $v_E$  are parameterized using Eyring's transition state theory, so that

|                                                                                                                               |       |
|-------------------------------------------------------------------------------------------------------------------------------|-------|
| $v(T) = v(T_0) \left(\frac{T}{T_0}\right) \exp\left(-\frac{\Delta H_V}{R_g} \left(\frac{1}{T} - \frac{1}{T_0}\right)\right),$ | (S79) |
|-------------------------------------------------------------------------------------------------------------------------------|-------|

where dummy variable  $v$  can be  $V_l$ ,  $V_S$  or  $v_E$ ,  $T_0$  is reference temperature, and  $\Delta H_V$  is enthalpy of activation.

In order to represent the temperature-induced conformation change in proteins,  $V_l$ ,  $V_S$  and  $v_E$  are further multiplied by  $f_{act}$  that is defined by

|                                                                               |       |
|-------------------------------------------------------------------------------|-------|
| $f_{act}(T) = \frac{1 + \exp(-\Delta G/R_g T_0)}{1 + \exp(-\Delta G/R_g T)},$ | (S80) |
|-------------------------------------------------------------------------------|-------|

with

|                                                                                 |       |
|---------------------------------------------------------------------------------|-------|
| $\Delta G = -n(\Delta H^* - 18.1T + \Delta C_p[(T - 373.6) - T \ln(T/385.2)]),$ | (S81) |
|---------------------------------------------------------------------------------|-------|

|                                                      |       |
|------------------------------------------------------|-------|
| $\Delta C_p = -46.0 + 30(1 - 1.54n^{-0.268})N_{CH},$ | (S82) |
|------------------------------------------------------|-------|

where  $n$  is the average number of amino acid residues in the proteins,  $N_{CH}$  is the average number of non-polar hydrogen atoms per amino acid residue,  $\Delta H^*$  is the enthalpy change at the convergence temperature for enthalpy set at 373.6 K.

$K_l$ ,  $K_S$ ,  $m_V$  and  $\gamma_B$  are parameterized using the Arrhenius function, which is

|                                                                                                                |       |
|----------------------------------------------------------------------------------------------------------------|-------|
| $\zeta(T) = \zeta(T_0) \exp\left(-\frac{\Delta H_\zeta}{R_g} \left(\frac{1}{T} - \frac{1}{T_0}\right)\right),$ | (S83) |
|----------------------------------------------------------------------------------------------------------------|-------|

where dummy variable  $\zeta$  can be  $K_l$ ,  $K_S$  or  $m_V$ ,  $T_0$  is reference temperature, and  $\Delta H_\zeta$  is enthalpy of activation.

## S7. Nomenclature

Table S1: Definition of symbols used in the models in sections

| Symbol       | Unit                                  | Definition                                                                                                                                                |
|--------------|---------------------------------------|-----------------------------------------------------------------------------------------------------------------------------------------------------------|
| $a$          | None                                  | Fraction of input carbon allocated to slow pool carbon                                                                                                    |
| $c_1$        | None                                  | Scaling parameter for growth respiration                                                                                                                  |
| $c_2$        | year <sup>-1</sup>                    | Scaling parameter for maintenance respiration                                                                                                             |
| $f_{act}$    | None                                  | Fraction of proteins in active states                                                                                                                     |
| $h$          | year <sup>-1</sup>                    | Total specific substrate uptake                                                                                                                           |
| $h_l$        | year <sup>-1</sup>                    | Specific fast carbon uptake rate                                                                                                                          |
| $h_s$        | year <sup>-1</sup>                    | Specific slow carbon uptake rate                                                                                                                          |
| $j_A$        | year <sup>-1</sup>                    | Specific substrate uptake rate without the carbon quota limiter for mDroop model; specific substrate uptake rate for VIS model, sDEB model and mDEB model |
| $m_V$        | year <sup>-1</sup>                    | Specific maintenance respiration rate for VIS model, sDEB model and mDEB model                                                                            |
| $n$          | None                                  | Average number of amino acid residues in the proteins                                                                                                     |
| $q$          | year <sup>-1</sup>                    | Specific substrate uptake rate                                                                                                                            |
| $t$          | year                                  | Time                                                                                                                                                      |
| $x$          | None                                  | Reserve biomass density                                                                                                                                   |
| $v_E$        | year <sup>-1</sup>                    | Specific reserve mobilization rate in the VIS model and DEB models                                                                                        |
| $B_C$        | gC m <sup>-3</sup>                    | Reserve biomass C for VIS model, sDEB model and mDEB model                                                                                                |
| $B_X$        | gC m <sup>-3</sup>                    | Reserve biomass C for VIS model, sDEB model and mDEB model                                                                                                |
| $B_T$        | gC m <sup>-3</sup>                    | Total biomass C for mDroop model.                                                                                                                         |
| $B_V$        | gC m <sup>-3</sup>                    | Structural biomass C                                                                                                                                      |
| $C_B$        | gC m <sup>-3</sup>                    | Total microbial biomass for Pirt model and Compromise model                                                                                               |
| $C_l$        | gC m <sup>-3</sup>                    | Fast pool C                                                                                                                                               |
| $C_s$        | gC m <sup>-3</sup>                    | Slow pool C                                                                                                                                               |
| $\Delta C_p$ | J mol <sup>-1</sup> K <sup>-1</sup>   | Heat capacity                                                                                                                                             |
| $F_{npp}$    | gC m <sup>-2</sup> year <sup>-1</sup> | Soil carbon input                                                                                                                                         |
| $\Delta G$   | J mol <sup>-1</sup>                   | Gibbs free energy for computing $f_{act}$                                                                                                                 |
| $\Delta H_V$ | J mol <sup>-1</sup>                   | Enthalpy of activation                                                                                                                                    |

|              |                                     |                                                                             |
|--------------|-------------------------------------|-----------------------------------------------------------------------------|
| $\Delta H^*$ | J mol <sup>-1</sup>                 | Enthalpy change at the convergence temperature for enthalpy set at 373.6 K. |
| $N_{CH}$     | None                                | Average number of non-polar hydrogen atoms per amino acid residue           |
| $Q$          | None                                | Carbon quota                                                                |
| $Q_{min}$    | None                                | Minimum carbon quota                                                        |
| $Q_{max}$    | None                                | Maximum carbon quota                                                        |
| $R$          | year <sup>-1</sup>                  | Specific respiration                                                        |
| $R_g$        | J mol <sup>-1</sup> K <sup>-1</sup> | Universal gas constant                                                      |
| $T$          | K                                   | Temperature                                                                 |
| $T_0$        | K                                   | Temperature                                                                 |
| $Y_B$        | None                                | Total biomass yield                                                         |
| $Y_b$        | None                                | Biomass yield for Pirt model and compromise model                           |
| $Y_{RV}$     | None                                | Structural biomass yield from reserve biomass                               |
| $Y_S$        | None                                | Reserve biomass yield from substrate assimilation                           |
| $Y_V$        | None                                | Structural biomass yield                                                    |
| $\mu$        | year <sup>-1</sup>                  | Specific growth rate                                                        |
| $\mu_{max}$  | year <sup>-1</sup>                  | Maximum specific growth rate                                                |
| $\theta$     | None                                | Normalized carbon quota for mDroop model                                    |
| $\gamma_B$   | year <sup>-1</sup>                  | Specific microbial mortality                                                |

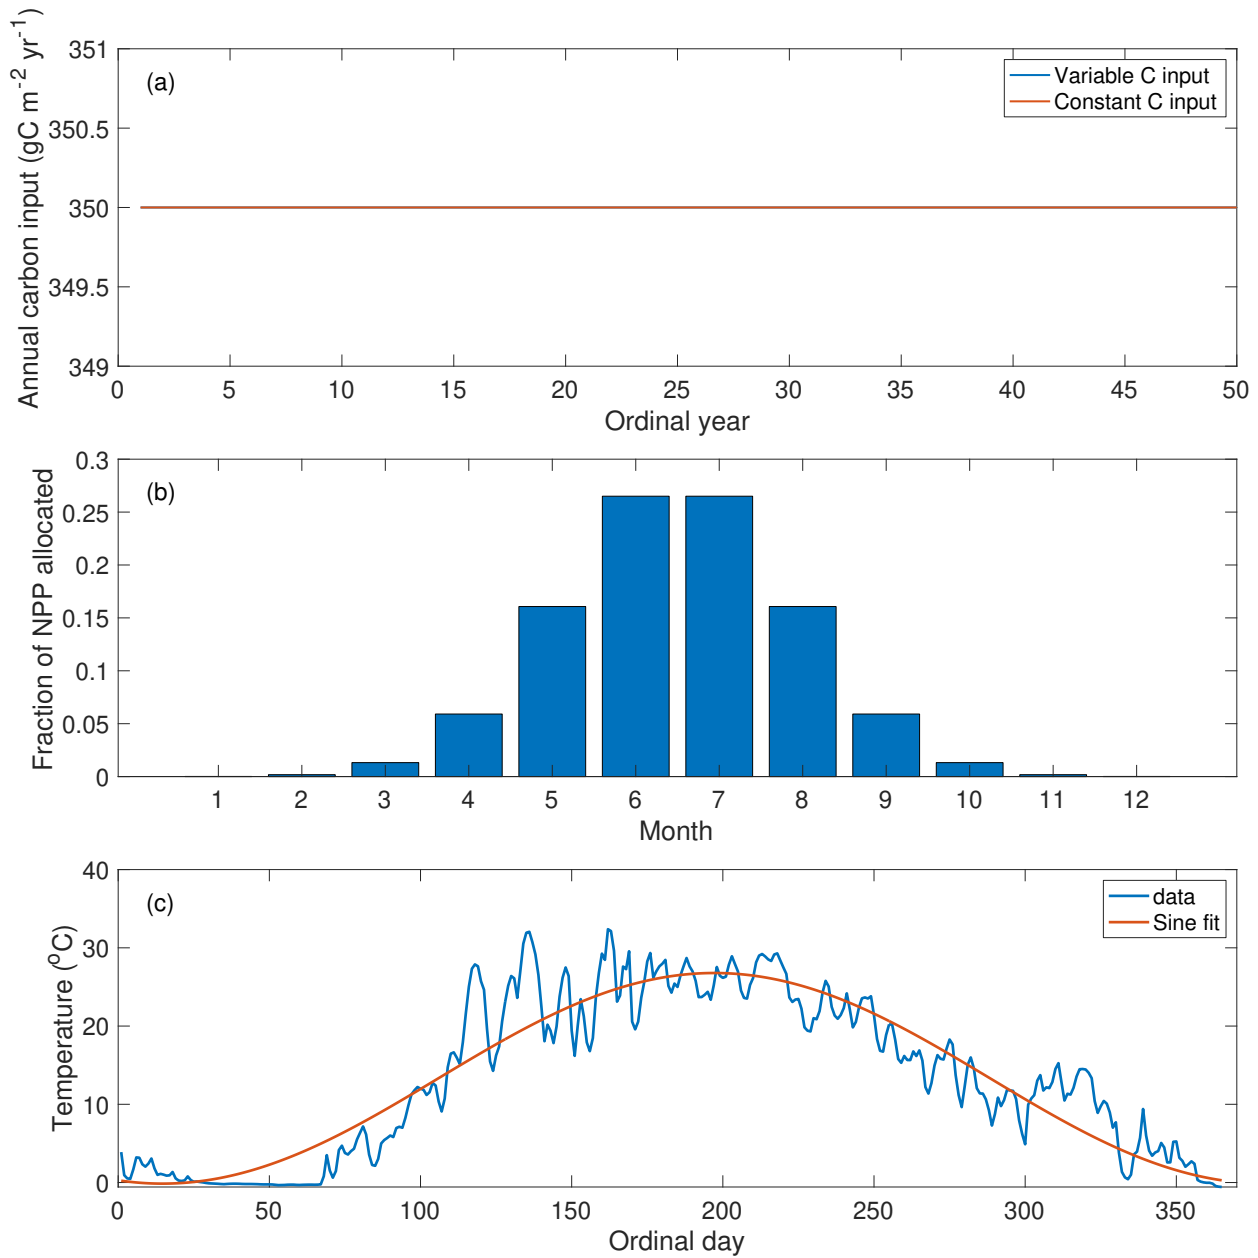

Figure S1. Forcing for the day-to-day varying temperature simulations: (a) annual carbon input for the 50-year simulations. The constant carbon input (red line) is used for simulations presented in Figures 3-6 of the main text, while the variable carbon input is used for CUE dynamics presented in Figures S4 and S5; (b) monthly allocation of carbon input for each year; (c) daily temperature (blue line) was taken at the 5 cm soil depth from a simulation for a US Midwest corn-field by the EcoSIM model ([https://github.com/jinyun1tang/EcoSIM/tree/main/examples/run\\_dir/dryland](https://github.com/jinyun1tang/EcoSIM/tree/main/examples/run_dir/dryland)). The red line is the best-fit using the sine function, which is  $T = 13.46\sin\left(\frac{2\pi}{365}n - 1.823\right) + 13.32$ , with  $n$  being the ordinal day.

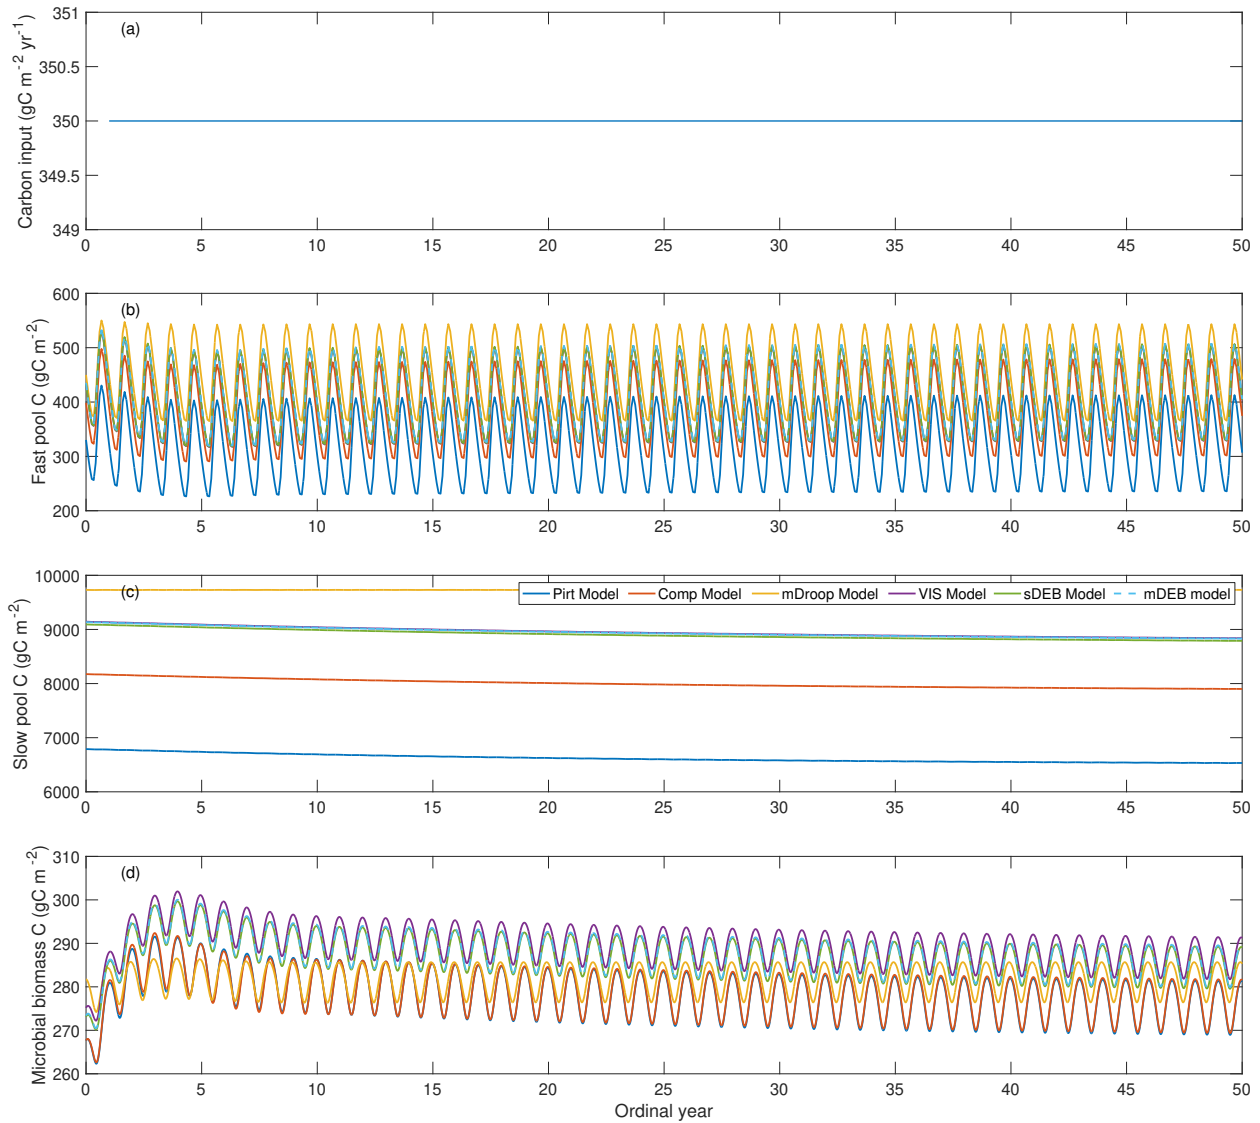

Figure S2 Simulation results from the six models under constant temperature: (a) Annual carbon input; (b) Fast pool C; (c) Slow pool C; and (d) Total microbial biomass C. In panels (b), (c) and (d), results by VIS model, sDEB model and mDEB model overlap each other. In panel (d), results by the Pirt model and Compromise model overlap each other. For the carbon input in each year, it is distributed to each month using the fraction in Figure S1a, which is then averaged by the total number of days in each month to obtain daily carbon input. (Figure needs update)

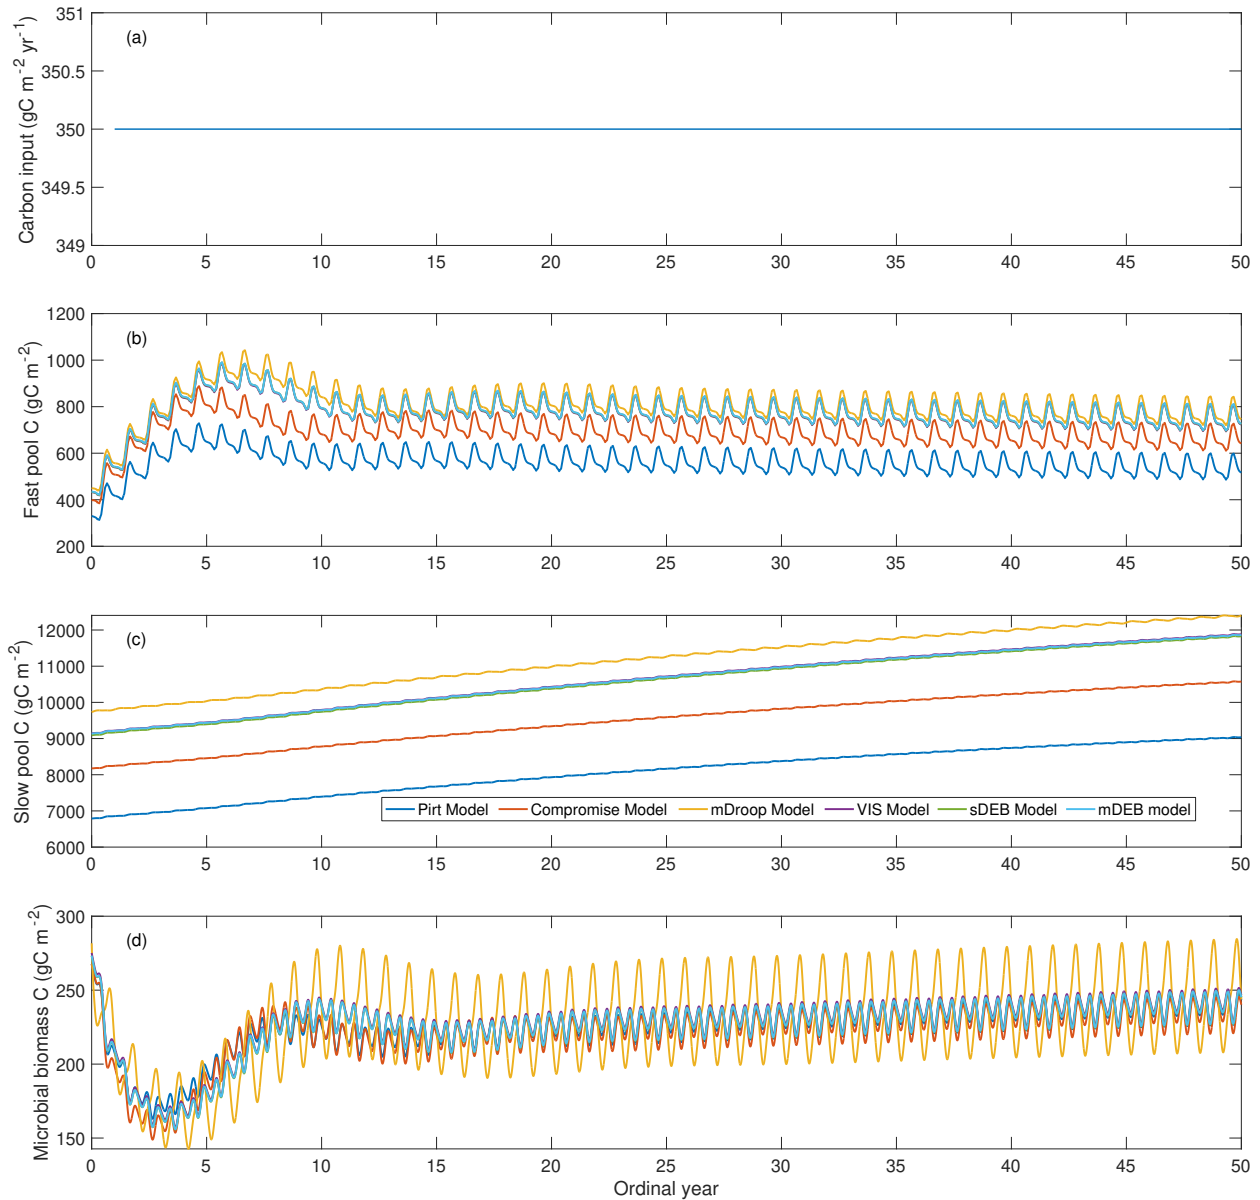

Figure S3. Simulation results from the six models under day-to-day varying temperature: (a) Annual carbon input; (b) Fast pool C; (c) Slow pool C; and (d) Total microbial biomass C. In panes (b), (c) and (d), results by VIS model, sDEB model and mDEB model overlap each other. For the carbon input in each year, it is distributed to each month using the fraction in Figure S1a, which is then averaged by the total number of days in each month to obtain daily carbon input. (Figure needs update)

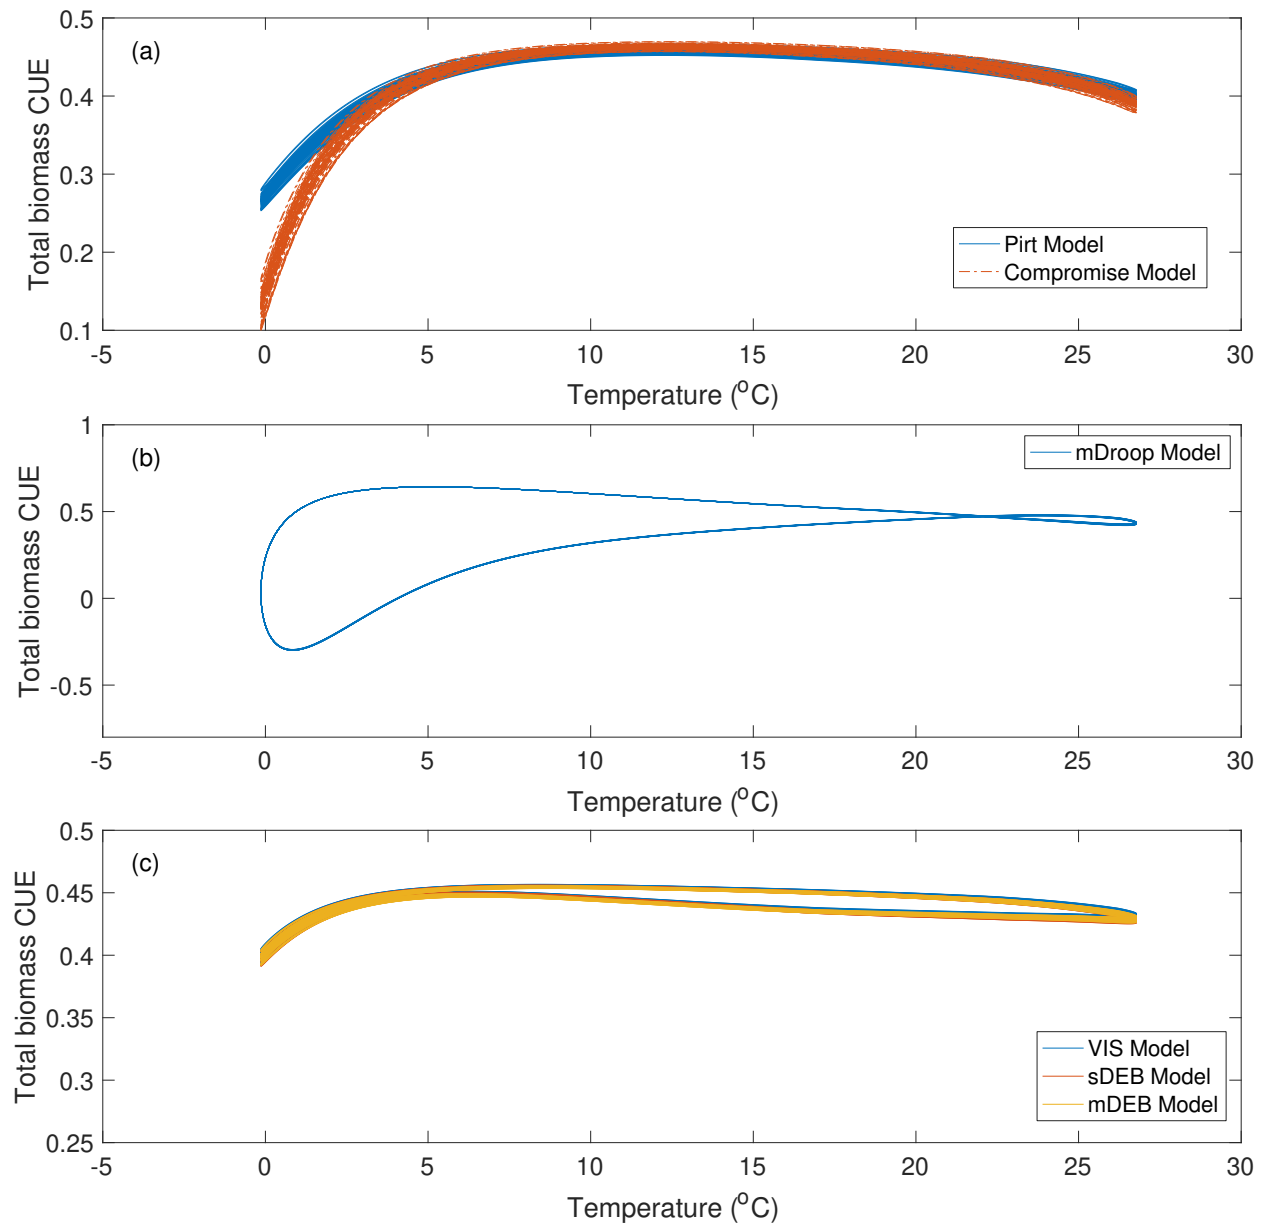

Figure S4. Variation of total biomass CUE with respect to temperature for different models. Results were plotted using the last 40 years of the 50-year simulations using monthly and annually variable carbon input (blue line in panel a of Figure S1), and smoothed daily temperature (red line in panel c of Figure S1).

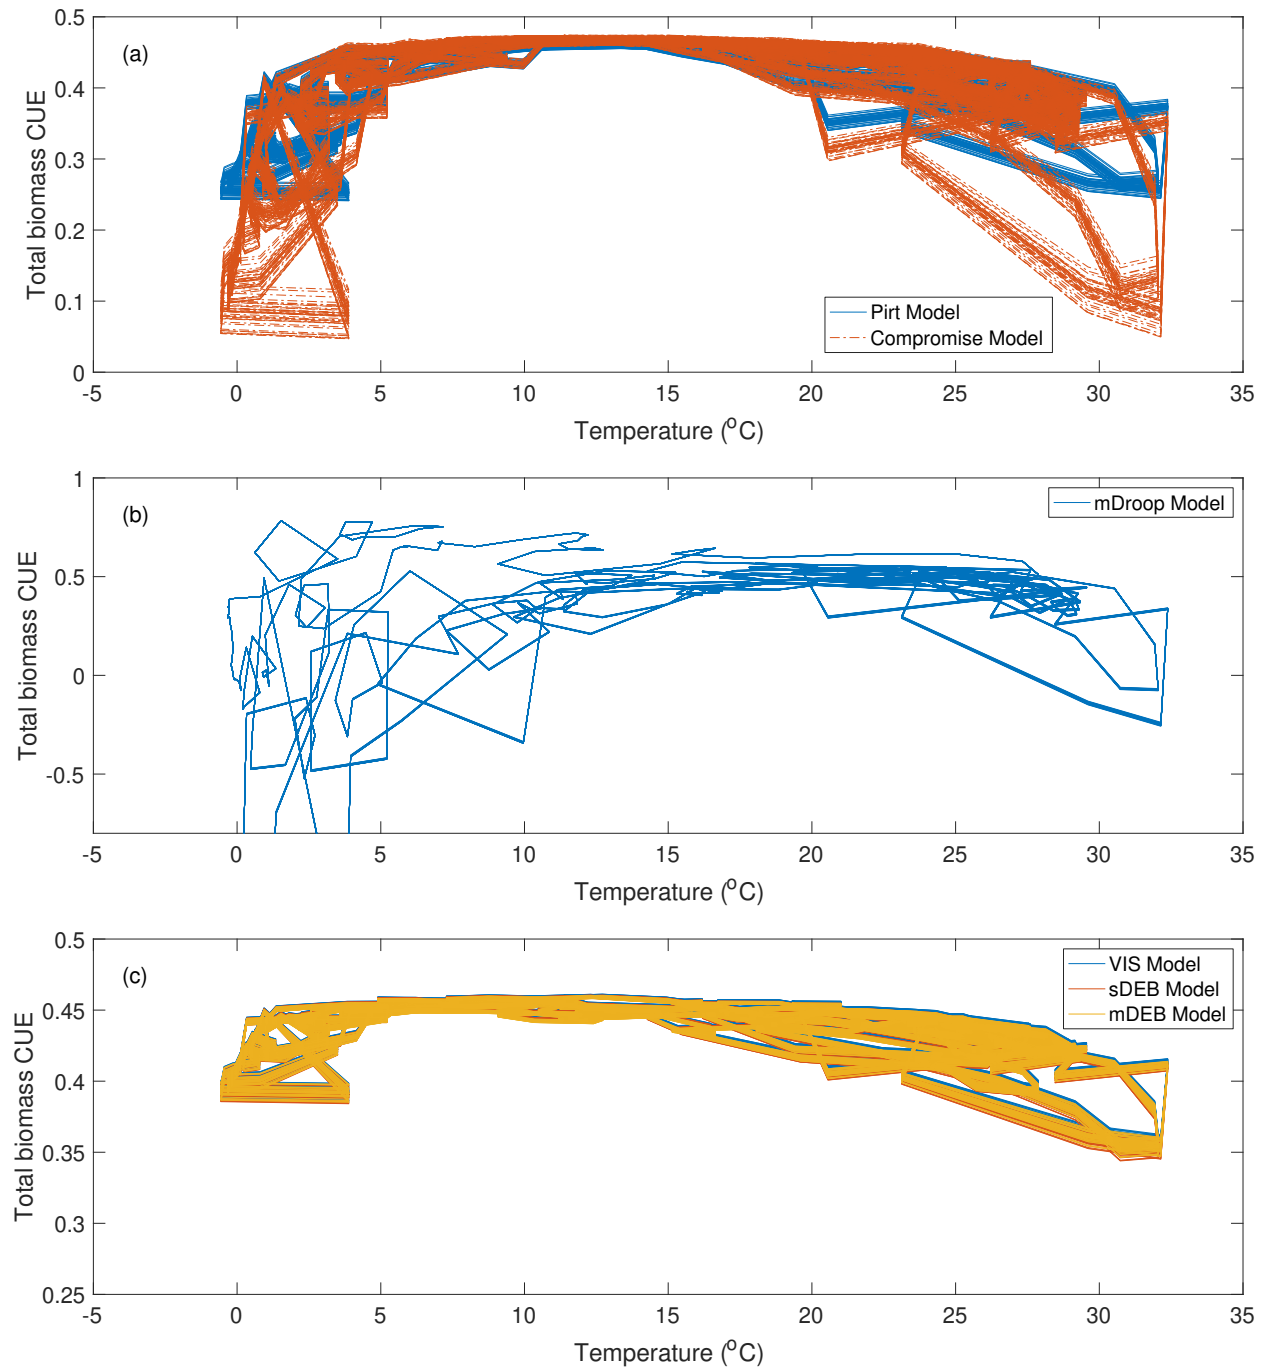

Figure S5. Variation of total biomass CUE with respect to temperature for different models. Results were plotted using the last 40 years of the 50-year simulations using monthly and annual variable carbon input (blue line in panel a of Figure S1), and non-smoothed daily temperature (blue line in panel c of Figure S1).

## Reference

Kooijman, S. A. L. M.: Dynamic Energy Budget Theory for Metabolic Organisation, Cambridge University Press, Cambridge, 10.1017/CBO9780511805400, 2009.

Tang, J. Y. and Riley, W. J.: Weaker soil carbon-climate feedbacks resulting from microbial and abiotic interactions, *Nature Climate Change*, 5, 56-60, 10.1038/Nclimate2438, 2015.

Tang, J. Y. and Riley, W. J.: Revising the dynamic energy budget theory with a new reserve mobilization rule and three example applications to bacterial growth, *Soil Biol Biochem*, 178, ARTN 108954 10.1016/j.soilbio.2023.108954, 2023.

Tang, J. Y. and Riley, W. J.: Technical note: A modified formulation of dynamic energy budget theory for faster computation of biological growth, *Biogeosciences*, 22, 1809-1819, 10.5194/bg-22-1809-2025, 2025.

Tang, J. Y., Riley, W. J., Manzoni, S., and Maggi, F.: Feasibility of Formulating Ecosystem Biogeochemical Models From Established Physical Rules, *J Geophys Res-Biogeophys*, 129, ARTN e2023JG007674 10.1029/2023JG007674, 2024.

Tang, J. Y., Riley, W. J., Marschmann, G. L., and Brodie, E. L.: Conceptualizing biogeochemical reactions with an Ohm's law analogy, *J Adv Model Earth Sy*, 13, ARTN e2021MS002469 10.1029/2021MS002469, 2021.

Thingstad, T. F.: Utilization of N, P, and organic C by heterotrophic bacteria .1. Outline of a chemostat theory with a consistent concept of maintenance metabolism, *Mar Ecol Prog Ser*, 35, 99-109, 10.3354/meps035099, 1987.

Thornley, J. H. M.: A balanced quantitative model for root: shoot ratios in vegetative plants, *Ann. Bot.*, 36, 431-441, 10.1093/oxfordjournals.aob.a084602, 1972.

Williams, F. M.: A Model of Cell Growth Dynamics, *J Theor Biol*, 15, 190-207, Doi 10.1016/0022-5193(67)90200-7, 1967.
